# Supplementary material for: Dietary supplementation with hybrid palm oil alters liver function in the common Marmoset
Source: PubMed Central journal article supplement (PMC5807430; doi:10.1038/s41598-018-21151-0), 2018-02-09

## **Dietary supplementation with hybrid palm oil alters liver function in the common Marmoset**

Flavia Spreafico<sup>1,3\*</sup>, Rafael Carvalho Sales<sup>1</sup>, Judit Gil-Zamorano<sup>2</sup>, Priscylla da Costa Medeiros<sup>3</sup>, Maria-Jesús Latasa<sup>2</sup>, Monique Ribeiro Lima<sup>1</sup>; Sergio Augusto Lopes de Souza<sup>3</sup>, Roberto Martín-Hernández<sup>2</sup>, Diego Gómez-Coronado<sup>4,5</sup>, Eduardo Iglesias-Gutierrez<sup>6,7</sup>, Diana C. Mantilla-Escalante<sup>2</sup>, Maria das Graças Tavares do Carmo<sup>1</sup>, Alberto Dávalos<sup>2\*</sup>.

<sup>1</sup>Instituto de Nutrição Josué de Castro, Universidade Federal do Rio de Janeiro, Rio de Janeiro, Brazil.

<sup>2</sup>Laboratory of Epigenetics of Lipid Metabolism, Instituto Madrileño de Estudios Avanzados (IMDEA)-Alimentación, CEI UAM+CSIC, Madrid 28049, Spain.

<sup>3</sup>Laboratório de Marcação de Células e Moléculas, Departamento de Radiologia, Faculdade de Medicina, Hospital Universitário Clementino Fraga Filho, UFRJ, Rio de Janeiro, Brazil.

<sup>4</sup>Servicio de Bioquímica-Investigación Hospital Universitario Ramón y Cajal, IRYCIS, Madrid 28034, Spain.

<sup>5</sup>CIBER Fisiopatología de la Obesidad y Nutrición (CIBEROBN), Instituto de Salud Carlos III, Spain.

<sup>6</sup>Department of Functional Biology (Physiology), University of Oviedo, Oviedo 33003, Spain.

<sup>7</sup>Universidad Autónoma de Chile, Santiago 7500912, Chile.

\*Correspondance to: (F. Spreafico) [flaviasfer@gmail.com](mailto:flaviasfer@gmail.com) or (A. Dávalos) [alberto.davalos@imdea.org](mailto:alberto.davalos@imdea.org)

## Supplementary Information

**Table S1.** GO analysis of predicted genes modulated by hybrid palm oil-modulated miRNAs

**Supplementary Figure S1:** Body weight progression (in grams) of the experimental groups during the nutritional intervention expressed as the mean of body weight  $\pm$  standard error, (n=10 animals per group). No significant differences were found between the groups according to t test at  $p < 0.05$ . AP: African Palm Group; HP: Hybrid Palm Group.

**Supplementary Figure S2:** Lipoprotein cholesterol and triglyceride profiles during dietary supplementation. (n=9 animals per group). AP: African Palm Group; HP: Hybrid Palm Group. A: AP group at 0, 1 and 3 months of dietary treatment, respectively. B: HP group at 0, 1 and 3 months of dietary treatment, respectively. VLDL: very low-density lipoproteins; LDL: low density lipoproteins; HDL: high density lipoproteins.

**Supplementary Figure S3.** Liver miRNAs validation by RT-qPCR. Hepatic miRNAs were analysed by RT-qPCR in both sexes. AP: African Palm Group; HP: Hybrid Palm Group. Values are expressed as mean  $\pm$  standard error (n=9 animals per group).

**Table S1.** GO analysis of predicted genes modulated by hybrid palm oil-modulated miRNAs

| ID              | Description                                        | Adjusted <i>P</i> value | N° of genes | Genes                                                                                                                                                                                                                                                                                                                                                                                                                                                                                                                                                                                                                                                       | microRNA's                                                                                                                                                       |
|-----------------|----------------------------------------------------|-------------------------|-------------|-------------------------------------------------------------------------------------------------------------------------------------------------------------------------------------------------------------------------------------------------------------------------------------------------------------------------------------------------------------------------------------------------------------------------------------------------------------------------------------------------------------------------------------------------------------------------------------------------------------------------------------------------------------|------------------------------------------------------------------------------------------------------------------------------------------------------------------|
| Panther: P00044 | Nicotinic acetylcholine receptor signaling pathway | 0.00885829              | 18          | Cacnb1, Chrng, Myh11, Myo5c, Stx1a, Vamp1, Cacna1c, Cacna1d, Chrn3, Myo18a, Myo3a, Acta1, Snap25, Actc1, Actr1b, Chrn2, Vamp2, Vamp8                                                                                                                                                                                                                                                                                                                                                                                                                                                                                                                        | calJac-let7b-5p, calJac-miR17b-5p-1, calJac-miR25b-3p, calJac-miR484-1, calJac-miR488-3p1, calJac-miR592, calJac-miR877-5p                                       |
| Kegg: 04514     | Cell adhesion molecules (CAMs)                     | 0.000000917             | 24          | Alcam, Cd8b, Cldn16, Cldn18, Itgb8, Sdc2, Vcan, Cd4, Cldn11, Cldn15, Cldn19, Hla-Doa, Itga9, Itgb7, Ncam1, Sdc1, Cd8a, Cdh3, Itgav, Madcam1, Mpzl1, Ocln, Sell, Siglec1                                                                                                                                                                                                                                                                                                                                                                                                                                                                                     | calJac-miR17b-5p-1, calJac-miR25b-3p, calJac-miR4745-5p, calJac-miR484-1, calJac-miR488-3p-1, calJac-miR877-5p                                                   |
| Kegg: 04146     | Peroxisome                                         | 0.0000909               | 12          | Acs14, Acs16, Crot, Pectr, Pex10, Gstk1, Hacl1, Hsd17b4, Paox, Pex11b, Pex26, Pex5                                                                                                                                                                                                                                                                                                                                                                                                                                                                                                                                                                          | calJac-let7b-5p, calJac-miR17b-5p-1, calJac-miR339-3p, calJac-miR488-3p-1                                                                                        |
| GO: 0031175     | neuron projection development                      | 0.00140149              | 10          | Cdk5, Cdk5r1, Cntn2, Igf1r, Lamb1, Lingo1, Tbc1d24, Cdh1, Lamc1, Rb1                                                                                                                                                                                                                                                                                                                                                                                                                                                                                                                                                                                        | calJac-let7b-5p, calJac-miR17b-5p-1, calJac-miR484-1, calJac-miR488-3p-1, calJac-miR592, calJac-miR877-5p                                                        |
| GO: 0030154     | cell differentiation                               | 0.0662095               | 109         | Cbfa2t3, Clic4, Cplx2, Dusp6, Fgf23, Gnptab, Igsf9, Nme1, Ptpu, Rasgrp1, Robo2, Ascl2, Bmpr1b, Cadm1, Dclk1, Dll1, Dll4, Dmrt1, Ereg, Fcrla, Kif2a, L1cam, Mapk7, Pappa, Pkdcc, Racgap1, Rnf17, Robo1, Rufy3, Sema3a, Sema3d, Sh2d2a, Siah1, Srpk1, Stmn1, Tll7, Usp42, Abhd5, Angpt2, Arhgap24, Bmp1, Bzw2, Camk2g, Caprin1, Caprin2, Col19a1, Csf1, Fgf1, Ggnbp2, Gldn, Grb2, If1a, Ift81, Jmjd6, Mgp, Mkl2, Nfatc4, Piwil2, Sema4b, Sema4g, Sema6d, Sort1, Sqstm1, Strbp, Suv39h2, Utp14c, Acsbg2, Chl1, Osr1, Clptm1, Dbn1, Fev, Hnf4a, Huwe1, Ndel1, Ntng1, Ppard, Slc9a1, Smurf1, Spata20, Tnfrsf12a, Asz1, Bmpr1a, Chrd11, Cit, Dmrt3, Epas1, Gna12, | calJac-let7b-5p, calJac-miR17b-5p-1, calJac-miR25b-3p, calJac-miR339-3p, calJac-miR4745-5p, calJac-miR484-1, calJac-miR488-3p-1, calJac-miR592, calJac-miR877-5p |

|  |  |  |                                                                                                                                                                      |  |
|--|--|--|----------------------------------------------------------------------------------------------------------------------------------------------------------------------|--|
|  |  |  | Myt11, Naa15, Nhs, Nrp2,<br>Pafah1b1, Pax5, Pax6,<br>Rbm38, Rnf114, Slc26a8,<br>Tnfrsf11, Tp53, Dcx,<br>Dhcr7, Dmrtd2, Hand2,<br>Ngef, Paqr5, Sirt1,<br>Tgfb1i1, Vtn |  |
|--|--|--|----------------------------------------------------------------------------------------------------------------------------------------------------------------------|--|

Supplementary Figure S1

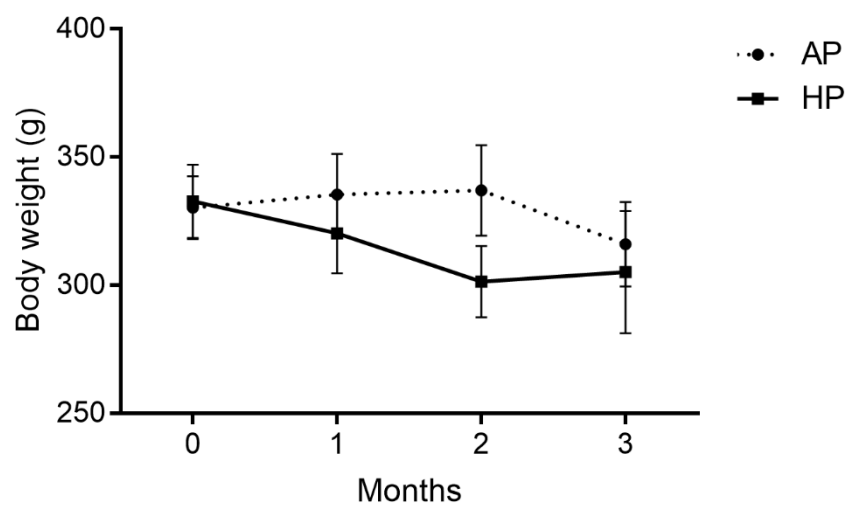



Supplementary Figure S3

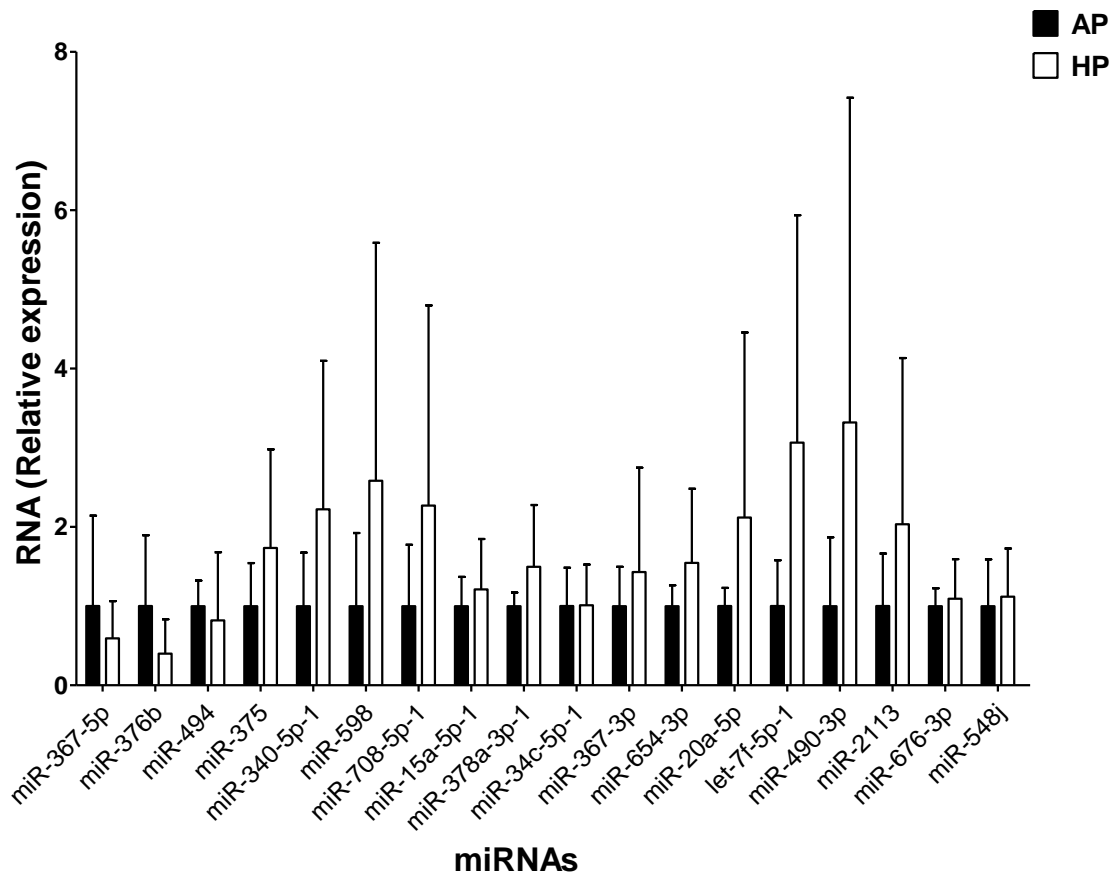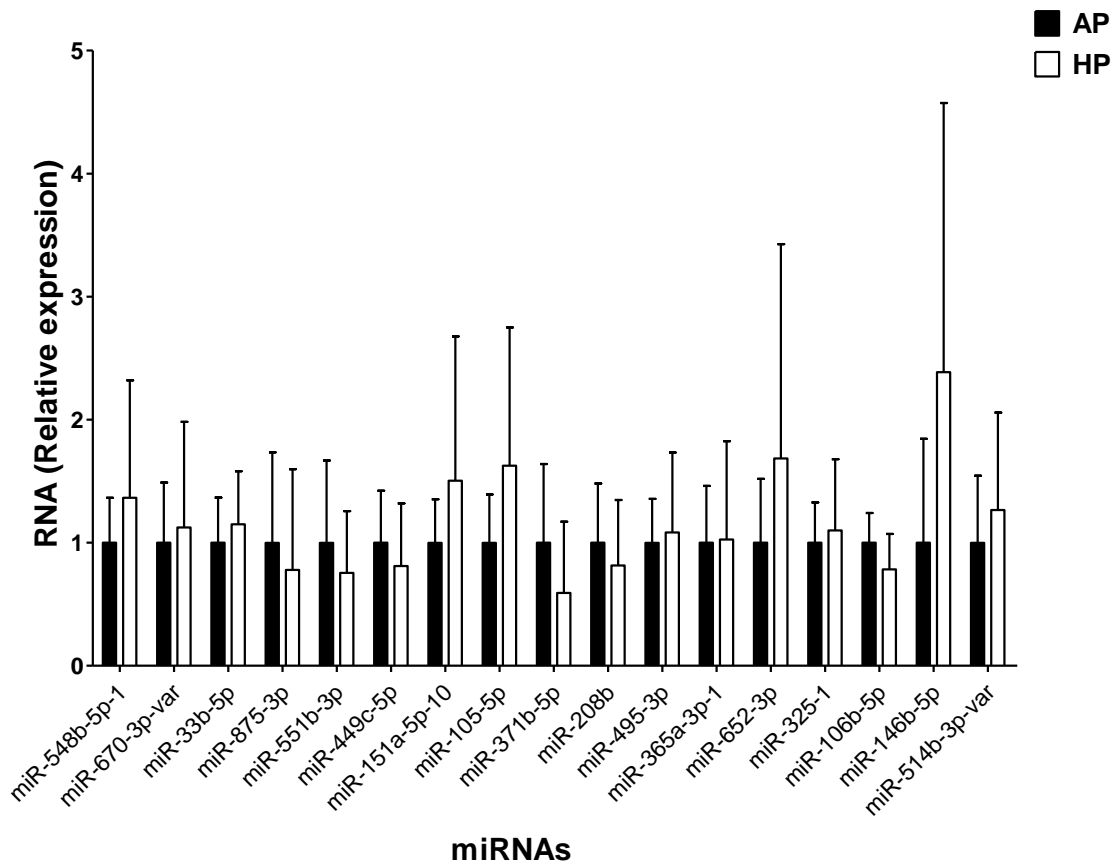

Supplement: 41598_2018_21151_MOESM1_ESM.pdf [file 41598_2018_21151_MOESM1_ESM.pdf]
